# Supplementary material for: Two temperature-controlled chiral Ag(i) coordination polymers with dual chiral components: synthesis, luminescence and SHG properties
Source: Royal Society of Chemistry journal article supplement (doi:10.1039/c2ce25317h), 2012-01-01
Supplement: c2ce25317h.pdf [file c2ce25317h.pdf]

**ELECTRONIC SUPPLEMENTARY DATA**

for

**Two temperature-controlled chiral Ag(I) coordination polymers with  
dual chiral components: synthesis, luminescence and SHG properties**

Lin Cheng\*, Li-Min Zhang, Shao-Hua Gou\*, Qing-Na Cao, Jian-Quan Wang and Lei  
Fang

*Pharmaceutical Research Center and School of Chemistry and Chemical Engineering,  
Southeast University, Nanjing 211189, P. R. China*

E-mail: [cep02chl@yahoo.com.cn](mailto:cep02chl@yahoo.com.cn); [sgou@seu.edu.cn](mailto:sgou@seu.edu.cn)

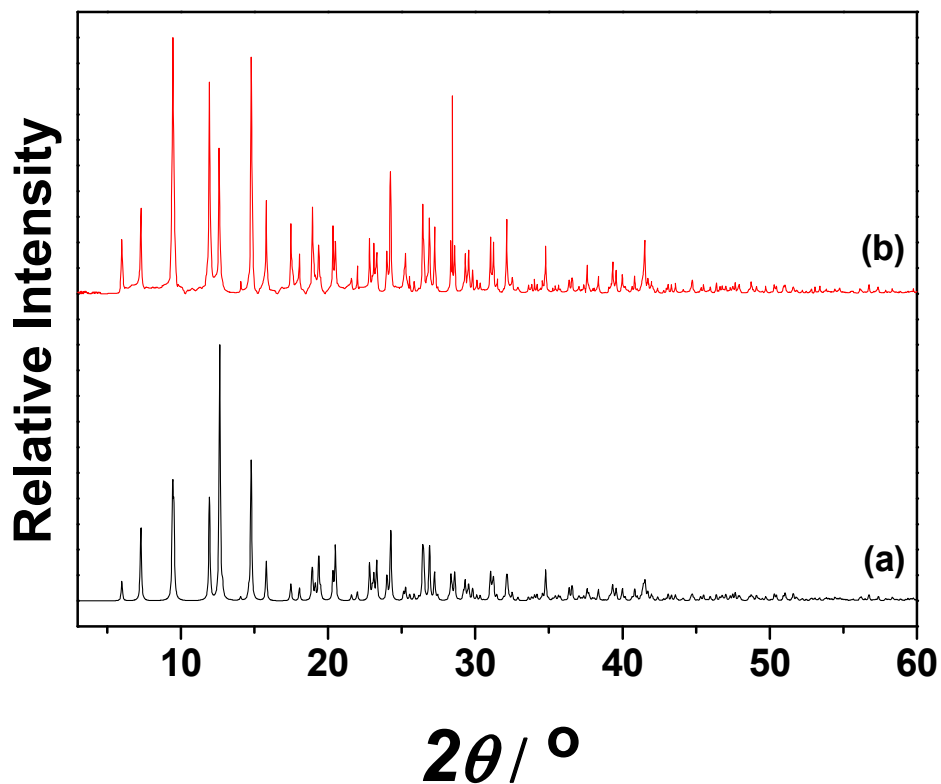

Fig S1. The XRD patterns of **1**, simulated from X-ray single crystal data (a) and polycrystalline as newly synthesized (b).

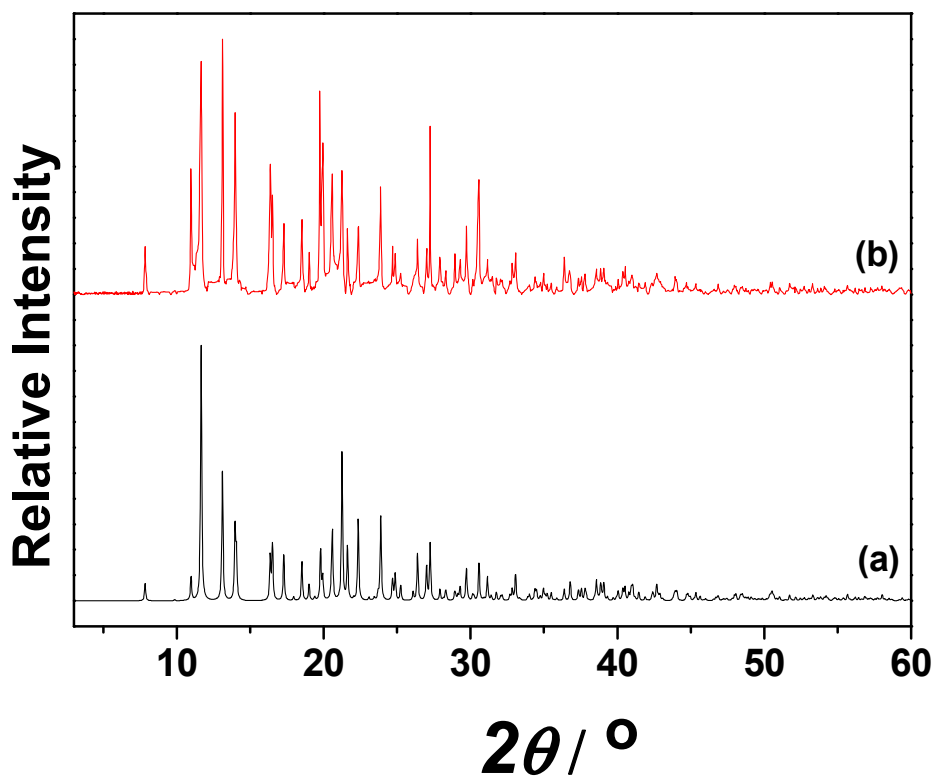

Fig S2. The XRD patterns of **2**, simulated from X-ray single crystal data (a) and polycrystalline as newly synthesized (b).

**Table S1.** Selected bond lengths (Å) and angles (°) for **1** and **2**.

| <b>1</b>    |           |              |           |
|-------------|-----------|--------------|-----------|
| Ag1-N2      | 2.285(9)  | Ag3-N1       | 2.313(10) |
| Ag1-N3      | 2.339(9)  | Ag3-N1g      | 2.313(12) |
| Ag1-N5      | 2.158(11) | Ag3-N1i      | 2.313(15) |
| Ag2-N4      | 2.176(11) | Ag4-N8       | 2.268(10) |
| Ag2-N6      | 2.349(9)  | Ag4-N8h      | 2.268(13) |
| Ag2-N7      | 2.334(11) | Ag4-N8j      | 2.268(15) |
| N2-Ag1-N3   | 76.6(3)   | N1-Ag3-N1g   | 114.6(4)  |
| N2-Ag1-N5   | 142.1(3)  | N1-Ag3-N1i   | 114.6(3)  |
| N3-Ag1-N5   | 141.4(3)  | N1g-Ag3-N1i  | 114.6(4)  |
| N4-Ag2-N6   | 143.5(3)  | N8-Ag4-N8h   | 120.0(4)  |
| N4-Ag2-N7   | 141.3(3)  | N8-Ag4-N8j   | 120.0(3)  |
| N6-Ag2-N7   | 75.1(3)   | N8h-Ag4-N8j  | 120.0(4)  |
| <b>2</b>    |           |              |           |
| Ag1-N2      | 2.388(9)  | Ag1-N4b      | 2.345(9)  |
| Ag1-N3      | 2.311(8)  | Ag1-N1c      | 2.303(10) |
| N2 -Ag1-N3  | 76.4(3)   | N3 -Ag1-N4b  | 124.2(3)  |
| N2 -Ag1-N4b | 105.5(3)  | N1c -Ag1-N3  | 129.4(3)  |
| N1c -Ag1-N2 | 118.3(3)  | N1c -Ag1-N4b | 99.6(3)   |

Symmetry code for **1**: g, -y, 1+x-y, z; h, 1-y, 2+x-y, z; i, 1-x+y, -x, z; j, 1-x+y, 1-x, z. for **2**: b, -4-x, 1/2+y, -2-z; c, -3-x, -1/2+y, -2-z.

**Table S2.** Selected Hydrogen Bond Lengths (Å) and Bond Angles (°) of **1** and **2** (D, donor atom; A, acceptor atom).

| D-H···A        | D-H [Å] | H···A [Å] | D···A [Å] | D-H···A [°] |
|----------------|---------|-----------|-----------|-------------|
| <b>1</b>       |         |           |           |             |
| N2-H2B···O4    | 0.93    | 2.19      | 2.988(11) | 143         |
| N3-H3B···O3k   | 0.93    | 2.14      | 3.051(10) | 168         |
| <b>2</b>       |         |           |           |             |
| O1w-H1wA···O4f | 0.85    | 2.18      | 2.89(4)   | 141         |
| O1w-H1wB···O2  | 0.85    | 2.14      | 2.80(4)   | 133         |
| N2-H2B···O1e   | 0.91    | 2.27      | 3.12(2)   | 154         |
| N3-H2B···O3f   | 0.91    | 2.24      | 3.13(2)   | 167         |

Symmetry code for **1**: k, 4/3-x+y, 1/3-x, 1/3+z for **2**: e, -3-x, 1/2+y, -1-z; f, -4-x, 1/2+y, -1-z.
